# Supplementary material for: Morphology dependent effect of γ-Al2O3for ethanol dehydration: nanorods and nanosheets
Source: Royal Society of Chemistry journal article supplement (doi:10.1039/d1ce01316e), 2021-12-14
Supplement: d1ce01316e1.pdf [file d1ce01316e1.pdf]

## Electronic Supplementary Information

### Morphology dependent effect of $\gamma$ -Al<sub>2</sub>O<sub>3</sub> for ethanol dehydration: nanorods and nanosheets

Li Deng,<sup>ab</sup> Shaobo Han,<sup>a</sup> Di Zhou,<sup>a</sup> Yong Li,<sup>\*a</sup> and Wenjie Shen<sup>a</sup>

<sup>a</sup> State Key Laboratory of Catalysis, Dalian Institute of Chemical Physics, Chinese  
Academy of Sciences, Dalian 116023, China.

<sup>b</sup> University of Chinese Academy of Sciences, Beijing 100049, China

\*E-mail: [yongli@dicp.ac.cn](mailto:yongli@dicp.ac.cn)

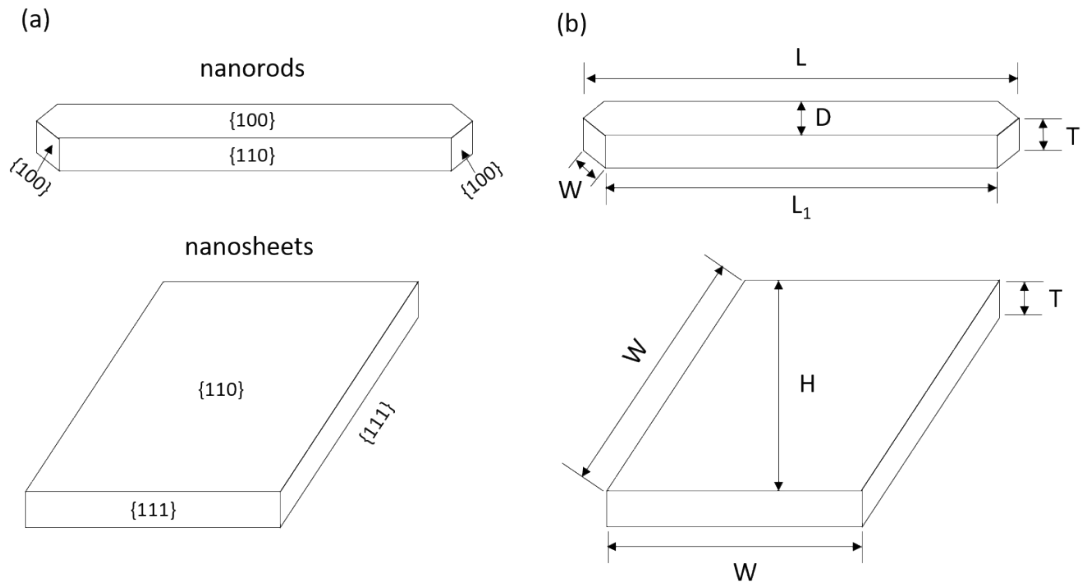

Fig. S1 (a) Schematic description of the  $\gamma$ -Al<sub>2</sub>O<sub>3</sub> nanorods and nanosheets with the exposed facets; (b) Dimensional parameters of the  $\gamma$ -Al<sub>2</sub>O<sub>3</sub> samples.

The length and diameter of {100} facets on nanorods were marked as L and D, respectively. L<sub>1</sub> and T were the length and thickness of {110} facets. The length of the {100} facets, located at the end of the rods, was marked as W. The average length (L) and diameter (D) of the  $\gamma$ -Al<sub>2</sub>O<sub>3</sub> samples were measured through the TEM images by counting at least 150 particles. For convenience of calculations, we assumed that T equaled to D. The angle between the {100} facets at the end of rods was 90°, thus L<sub>1</sub> and W could be determined to be L-D and  $\sqrt{2}D/2$ .

The area of the {100} facet on the nanorods is

$$S_{100} = 2 \times D \times L_1 + 4 \times \frac{1}{2} \times D \times \frac{L - L_1}{2} + 4 \times W \times T$$

$$= D \times (L + L_1) + 4 \times W \times T$$

The area of the {110} facet is

$$S_{110} = 2 \times T \times L_1$$

The total area is

$$S = S_{110} + S_{100}$$

The percentage of each facet is

$$P_i = \frac{S_i}{S} \times 100\%$$

For nanosheets, W represented the side length of the rhomboid {110} facets.

The height of the {110} facets was marked as H, while the thickness of the nanosheets was defined as T. The average side length (W) and height of {110} facets (H) as well as the thickness (T) of the  $\gamma$ -Al<sub>2</sub>O<sub>3</sub> nanosheets were measured through the TEM images by counting at least 150 particles.

The area of the {110} facet on nanosheet is

$$S_{110} = 2 \times W \times H$$

The area of the {111} facet is

$$S_{111} = 4 \times W \times T$$

The total area is

$$S = S_{110} + S_{111}$$

The percentage of each facet is

$$P_i = \frac{S_i}{S} \times 100$$

Table. S1 Crystallite sizes of the  $\gamma$ -AlOOH particles synthesized at different pH values (453 K for 48 h).

| pH  | Crystallite size (nm) <sup>a</sup> |                        |
|-----|------------------------------------|------------------------|
| 5.4 | 12.3                               |                        |
| 7.0 | 13.2                               |                        |
| 8.0 | 11.3                               | <sup>a</sup> Calculate |
| 9.0 | 15.1                               | d from                 |

the (020) diffraction line by Scherrer's equation.

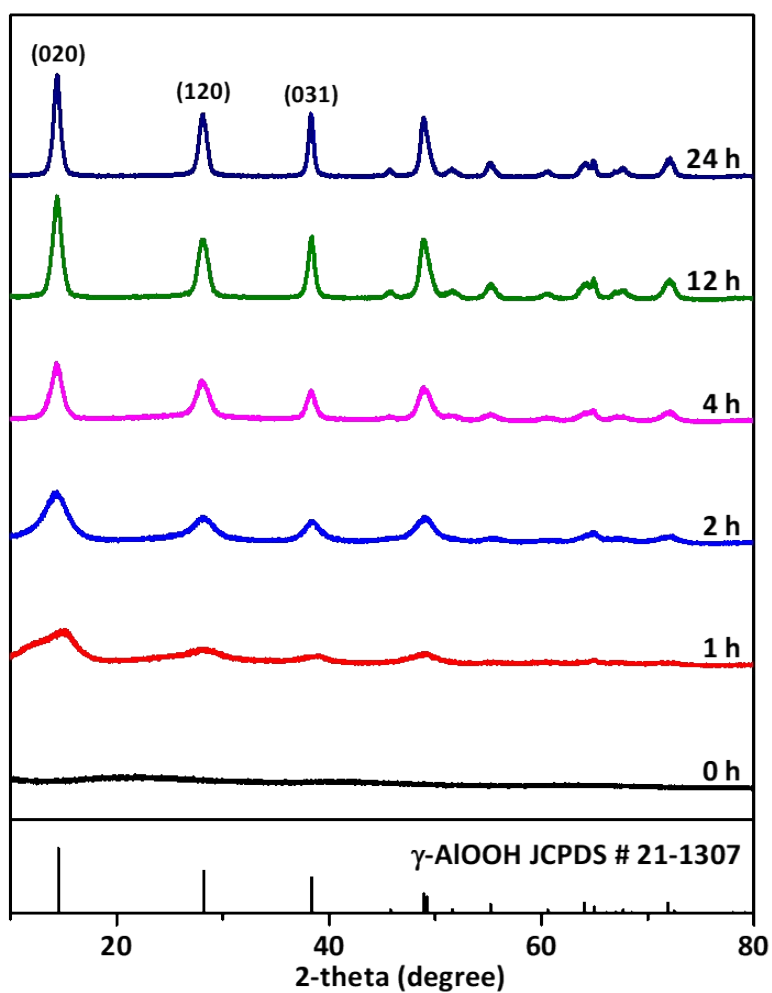

Fig. S2 XRD patterns of the intermediate products during the synthesis of nanorods (pH = 7.0, 453 K) at 0 h, 1 h, 2 h, 4 h, 12 h and 24 h.

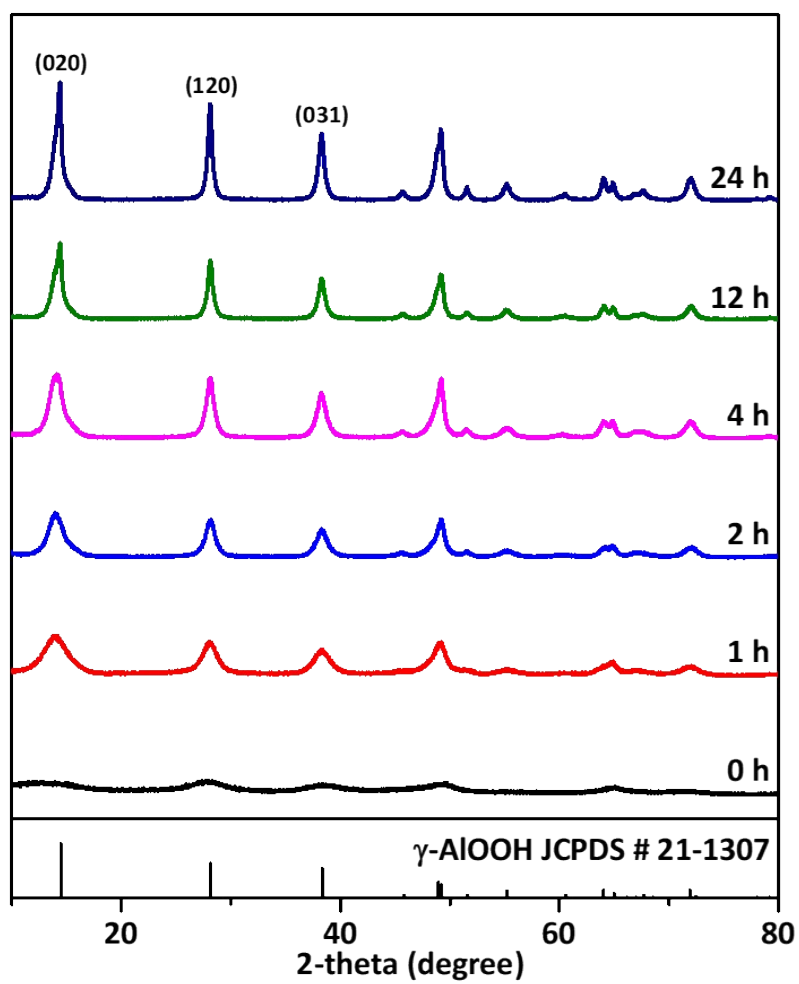

Fig. S3 XRD patterns of the intermediate products during the synthesis of nanosheets (pH = 9.0, 453 K) at 0 h, 1 h, 2 h, 4 h, 12 h and 24 h.

Table S2 Crystallite Sizes of the  $\gamma$ -AlOOH nanorods (pH = 7.0, 453 K) and nanosheets (pH = 9.0, 453 K) synthesized at different intervals.

| Synthesis Time / h | Crystallite size (nm) <sup>a</sup> |            |
|--------------------|------------------------------------|------------|
|                    | nanorods                           | nanosheets |
| 1                  | 2.3                                | 7.7        |
| 2                  | 7.8                                | 8.1        |
| 4                  | 9.4                                | 8.6        |
| 12                 | 10.2                               | 8.8        |
| 24                 | 12.1                               | 14.7       |

<sup>a</sup>Calc

ulated from the (020) diffraction line by Scherrer's equation.

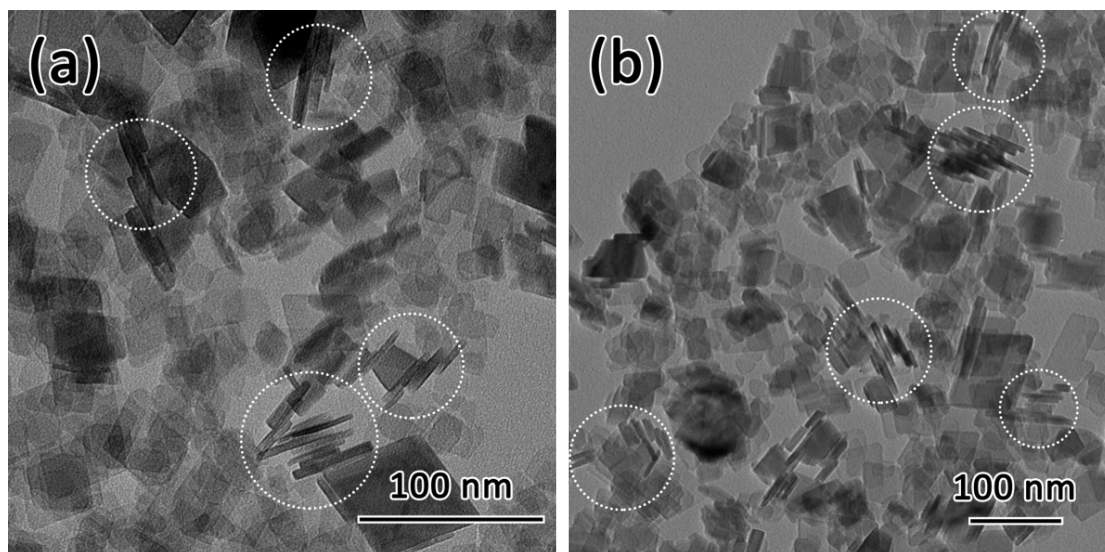

Fig. S4 TEM images of the side view of  $\gamma$ -AlOOH nanosheets synthesized at pH 9.0 for 12 h (a) and 24 h (b). The thickness was determined from the side view of the nanosheets (vertical direction, highlighted in white circle) in the TEM images.



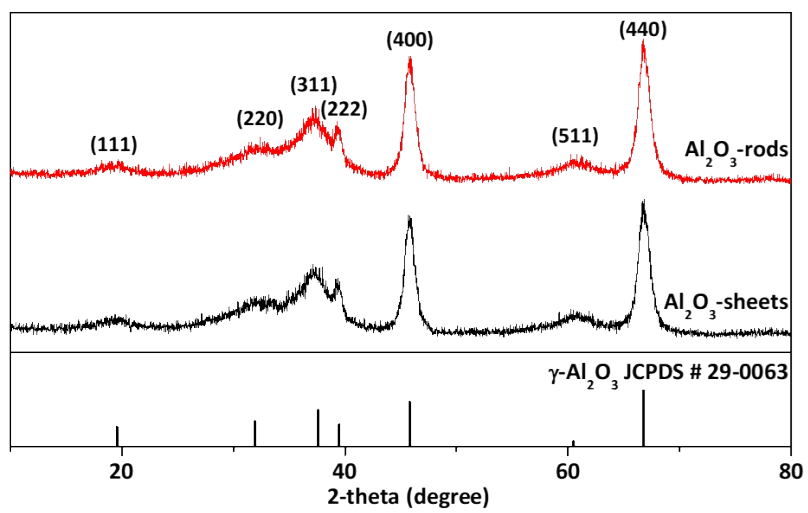

Fig. S5 XRD patterns of  $\gamma\text{-Al}_2\text{O}_3$  obtained by thermal calcination of  $\gamma\text{-AlOOH}$  nanorods and nanosheets at 873 K.

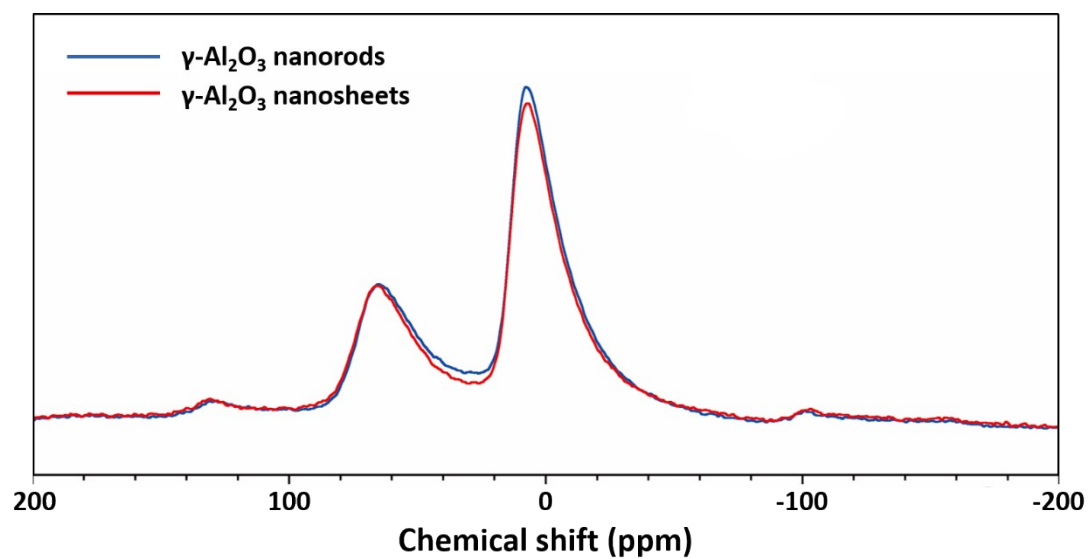

Fig. S6 Solid-state  $^{27}\text{Al}$  MAS-NMR spectra of  $\gamma\text{-Al}_2\text{O}_3$  nanorods and nanosheets.
